# Supplementary material for: White Adipose Tissue Response of Obese Mice to Ambient Oxygen Restriction at Thermoneutrality: Response Markers Identified, but no WAT Inflammation
Source: MDPI journal article supplement (doi:10.3390/genes10050359), 2019-05-10
Supplement: s1 [file s1]

**Supplementary Table S1** Diet composition

| Components                             | LFD   | HFD   |
|----------------------------------------|-------|-------|
| Casein                                 | 220   | 267   |
| Wheat starch                           | 386.5 | 172.5 |
| Maltodextrin                           | 100   | 100   |
| Dextrose                               | 50    | 50    |
| Sucrose                                | 100   | 100   |
| Fats*                                  | 43    | 210   |
| Cholesterol                            | 0.03  | 0.097 |
| Cellulose                              | 50    | 50    |
| Mineral mixture                        | 35    | 35    |
| Vitamin mixture                        | 10    | 10    |
| Choline bitartrate                     | 2.5   | 2.5   |
| L-cysteine                             | 3     | 3     |
| Energy (kcal kg <sup>-1</sup> )        | 3865  | 4700  |
| Percentage of energy from carbohydrate | 66.9  | 36.8  |
| Percentage of energy from fat          | 10.0  | 40.2  |
| Percentage of energy from protein      | 23.1  | 23.0  |

Values are in grams per kilogram, unless stated otherwise. Energy content is adjusted for energy from the vitamin mix. \*Fats consist of 18% (w/w) coconut oil, 70% sunflower oil, and 12% flaxseed oil. LFD as published (Hoevenaars, et al., 2012; ref. 26).
