# Supplementary material for: White Adipose Tissue Response of Obese Mice to Ambient Oxygen Restriction at Thermoneutrality: Response Markers Identified, but no WAT Inflammation
Source: MDPI journal article supplement (doi:10.3390/genes10050359), 2019-05-10
Supplement: s1 [file s1]

**Supplementary Table S3.** Marker gene expression in eWAT for adipogenesis-, angiogenesis-, hypoxia-, and inflammation-related processes between OxR and Control mice.

| Gene symbol         | Gene name/marker                                                                                                   | FC   | P-value |
|---------------------|--------------------------------------------------------------------------------------------------------------------|------|---------|
| <b>Adipogenesis</b> |                                                                                                                    |      |         |
| <i>Pparg</i>        | peroxisome proliferator activated receptor gamma                                                                   | 1.1  | 0.32    |
| <i>Slc2a4</i>       | solute carrier family 2 (facilitated glucose transporter), member 4; a.k.a. Glucose transporter 4 ( <i>Glut4</i> ) | 1.2  | 0.55    |
| <i>Zfp423</i>       | zinc finger protein 423                                                                                            | -1.1 | 0.62    |
| <b>Angiogenesis</b> |                                                                                                                    |      |         |
| <i>Angpt1</i>       | angiopoietin 1                                                                                                     | -1.1 | 0.34    |
| <i>Angpt2</i>       | angiopoietin 2                                                                                                     | 1.3  | 0.10    |
| <i>Epcam</i>        | epithelial cell adhesion molecule                                                                                  | -1.2 | 0.49    |
| <i>Flt1</i>         | FMS-like tyrosine kinase 1                                                                                         | 1.1  | 0.22    |
| <i>Kdr</i>          | kinase insert domain protein receptor                                                                              | 1.1  | 0.36    |
| <i>Tie1</i>         | tyrosine kinase with immunoglobulin-like and EGF-like domains 1                                                    | 1.0  | 0.69    |
| <i>Vcam1</i>        | vascular cell adhesion molecule 1                                                                                  | -1.1 | 0.32    |
| <i>Vegfa</i>        | vascular endothelial growth factor A                                                                               | 1.2  | 0.24    |
| <i>Vegfb</i>        | vascular endothelial growth factor B                                                                               | 1.1  | 0.38    |
| <b>Hypoxia</b>      |                                                                                                                    |      |         |
| <i>Slc2a1</i>       | solute carrier family 2 (facilitated glucose transporter), member 1; a.k.a. Glucose transporter 1 ( <i>Glut1</i> ) | 1.2  | 0.40    |
| <i>Spp1</i>         | Secreted phosphoprotein 1; a.k.a. Osteopontin ( <i>Opn</i> )                                                       | -1.1 | 0.74    |
| <b>Inflammation</b> |                                                                                                                    |      |         |
| <i>Adgre1</i>       | adhesion G protein-coupled receptor E1; a.k.a. F4/80                                                               | n.d. |         |
| <i>Arg1</i>         | arginase, liver; M2 macrophage marker                                                                              | 1.2  | 0.37    |
| <i>Ccl2</i>         | chemokine (C-C motif) ligand 2                                                                                     | 1.2  | 0.21    |
| <i>Cybb</i>         | cytochrome b-245, beta polypeptide; a.k.a. <i>Nox2</i>                                                             | 1.0  | 0.73    |
| <i>Il1</i>          | interleukin 1 complex                                                                                              | n.d. |         |
| <i>Il6</i>          | interleukin 6                                                                                                      | 1.4  | 0.06    |
| <i>Itgam</i>        | integrin alpha M; a.k.a. CD11b                                                                                     | 1.2  | 0.22    |
| <i>Itgax</i>        | integrin alpha X; a.k.a. CD11c                                                                                     | 1.0  | 0.93    |
| <i>Mif</i>          | macrophage migration inhibitory factor (glycosylation-inhibiting factor)                                           | 1.1  | 0.26    |
| <i>Mmp2</i>         | matrix metalloproteinase 2                                                                                         | 1.0  | 0.91    |
| <i>Mmp9</i>         | matrix metalloproteinase 9                                                                                         | 1.1  | 0.39    |
| <i>Nos2</i>         | nitric oxide synthase 2, inducible; M1 macrophage marker                                                           | 1.1  | 0.41    |
| <i>Tnf</i>          | tumor necrosis factor                                                                                              | 1.1  | 0.52    |
| <i>Serpine1</i>     | serine (or cysteine) peptidase inhibitor, clade E, member 1; a.k.a. PAI-1                                          | 1.1  | 0.73    |

Categorized transcripts per process were subsequently sorted based on alphabetical order. FC: fold change of oxygen restricted (OxR) group over control group; a.k.a.: also known as; n.d.: no detectable expression levels. In case multiple probes are present on the Agilent gene expression array, the one with highest FC with lowest p-value is shown.
