# Supplementary material for: White Adipose Tissue Response of Obese Mice to Ambient Oxygen Restriction at Thermoneutrality: Response Markers Identified, but no WAT Inflammation
Source: MDPI journal article supplement (doi:10.3390/genes10050359), 2019-05-10
Supplement: s1 [file s1]

**Supplementary Table S2** Primers and annealing temperature for RT-qPCR

| Gene                 | Accession      | Forward 5'-3'            | Reverse 5'-3'                 | T (°C) |
|----------------------|----------------|--------------------------|-------------------------------|--------|
| <i>Alas</i>          | NM_001102446   | TCAGACACAATGACCCAGGC     | CGAAGGTCAGGGCTCCATAC          | 58     |
| <i>Ankrd37</i>       | NM_001039562.1 | CAGGTGCTGACCTCAACCAAC    | CCAAGCAAGATCTTCAGCTGTC        | 58     |
| <i>Ccdc3</i>         | NM_028804.1    | CCCGGCTCAACCTTACTGG      | GAAATTGACTCCGTGTGGCA          | 56.5   |
| <i>Cck</i>           | NM_031161      | ACTGCTAGCGCGATACATCC     | CATCCAGCCCATGTAGTCCC          | 58     |
| <i>S100a8</i>        | NM_013650      | ACTTCGAGGAGTTCCTTGCG     | TGCTACTCCTTGTGGCTGTC          | 58     |
| <i>Il18</i>          | NM_008361      | TGCACTACAGGCTCCGAGAT     | AGGCCACAGGTATTTTGTCTGT        | 58     |
| <i>Pla2</i>          | NM_012044      | GGACGAGACGGATTGGTGTT     | AGTGTTTCAGGTTGTGGCGAA         | 58     |
| <i>Slc2a1/ Glut1</i> | NM_011400.3    | TATCGTCAACACGGCCTTCA     | TGGCCACGATGCTCAGATAG          | 58     |
| <i>B2m*</i>          | NM_009735      | CCCCACTGAGACTGATACATACGC | AGAAACTGGATTGTAAATTAAGCAGGTTC | 60     |
| <i>Rps15*</i>        | NM_009091      | CGGAGATGGTGGGTAGCATGG    | ACGGGTTTGTAGGTGATGGAGAAC      | 58     |

\*genes denoted with an asterisk were together used as reference genes for RT-qPCR. Annealing temperature for RT-qPCR is provided in degrees Celsius.
