# Supplementary material for: White Adipose Tissue Response of Obese Mice to Ambient Oxygen Restriction at Thermoneutrality: Response Markers Identified, but no WAT Inflammation
Source: MDPI journal article supplement (doi:10.3390/genes10050359), 2019-05-10
Supplement: s1 [file s1]

**Supplementary Table S5.** Genes up regulated by OxR with a fold change > 1.25 and p<0.01

| Gene symbol                                       | Gene name                                               | FC  | P value |
|---------------------------------------------------|---------------------------------------------------------|-----|---------|
| <b>Response to OxR</b>                            |                                                         |     |         |
| <i>Alas2</i>                                      | Aminolevulinic acid synthase 2, erythroid               | 2.1 | 0.0013  |
| <i>Ankrd37</i>                                    | Ankyrin repeat domain 37                                | 1.6 | 0.0008  |
| <i>Beta-s</i>                                     | Hemoglobin subunit beta-1-like                          | 2.1 | 0.0009  |
| <i>Chrdl1</i>                                     | Chordin-like 1                                          | 1.9 | 0.0017  |
| <i>Cish</i>                                       | Cytokine inducible SH2-containing protein               | 1.7 | 0.0094  |
| <i>Edn1</i>                                       | Endothelin 1                                            | 1.3 | 0.0067  |
| <i>Gm5226</i>                                     |                                                         | 2   | 0.0007  |
| <i>Hba-a1</i>                                     | Hemoglobin alpha, adult chain 1                         | 1.9 | 0.0045  |
| <i>Hba-a2</i>                                     | Hemoglobin alpha, adult chain 2                         | 1.9 | 0.0073  |
| <i>Hbb-b1</i>                                     | Hemoglobin, beta adult major chain                      | 2   | 0.0017  |
| <i>Hbb-b2</i>                                     | Hemoglobin, beta adult minor chain                      | 1.9 | 0.0005  |
| <i>Slc25a37</i>                                   | Solute carrier family 25, member 37                     | 1.3 | 0.0003  |
| <i>Slc4a1</i>                                     | Solute carrier family 4 (anion exchanger), member 1     | 1.5 | 0.0006  |
| <b>Signalling</b>                                 |                                                         |     |         |
| <i>1300014I06Rik</i>                              | PX domain containing 1                                  | 1.4 | 0.0020  |
| <i>Enc1</i>                                       | Ectodermal-neural cortex 1                              | 1.3 | 0.0087  |
| <i>Hic1</i>                                       | Hypermethylated in cancer 1                             | 1.3 | 0.0042  |
| <i>Htra3</i>                                      | HtrA serine peptidase 3                                 | 1.4 | 0.0076  |
| <i>Ras16</i>                                      | Regulation of G-protein signalling 16                   | 1.3 | 0.0082  |
| <i>Tmem198</i>                                    | Transmembrane protein 198                               | 1.3 | 0.0021  |
| <b>Adipocyte cytoskeleton and matrix proteins</b> |                                                         |     |         |
| <i>Has2</i>                                       | Hyaluronan synthase 2                                   | 1.3 | 0.0095  |
| <i>St6galnac5</i>                                 | ST6 (alpha-N-acetyl-neuraminyl-2,3-beta-galactosyl      | 1.5 | 0.0044  |
| <i>Zdhhc22</i>                                    | Zinc finger, DHCC-type containing 22                    | 2.1 | 0.0013  |
| <i>Tubb3</i>                                      | Tubulin, beta 3 class III                               | 1.4 | 0.0049  |
| <b>Inflammation</b>                               |                                                         |     |         |
| <i>Darc</i>                                       | Duffy blood group, chemokine receptor                   | 1.3 | 0.0008  |
| <i>Fam46c</i>                                     | Family with sequence similarity 46, member C            | 1.4 | 0.0070  |
| <i>Tnfsf9</i>                                     | Tumor necrosis factor (ligand) superfamily, member C    | 1.3 | 0.0091  |
| <b>Oxidative stress defence</b>                   |                                                         |     |         |
| <i>Gstm1</i>                                      | Gluthathione S-transferase, mu 1                        | 1.5 | 0.0023  |
| <i>Gstm4</i>                                      | Gluthathione S-transferase, mu 4                        | 1.4 | 0.0024  |
| <b>Miscellaneous</b>                              |                                                         |     |         |
| <i>Gnat2</i>                                      | Guanine nucleotide binding protein, alpha transducing 2 | 1.3 | 0.0058  |
| <i>Prpf4b</i>                                     | PRP4 pre-mRNA processing factor 4 homolog B (yeast)     | 1.3 | 0.0026  |
| <b>Unknown</b>                                    |                                                         |     |         |
| <i>2700081O15Rik</i>                              |                                                         | 1.3 | 0.0084  |
| <i>4930415C11Rik</i>                              |                                                         | 1.4 | 0.0013  |
| <i>chr1:107866276-107887102 R</i>                 |                                                         | 1.3 | 0.0059  |
| <i>chr8:106037800-106070025 F</i>                 |                                                         | 1.3 | 0.0044  |
| <i>chr8:74431707-74442440 F</i>                   |                                                         | 1.3 | 0.0008  |
| <i>chr10:69819062-69871640 F</i>                  |                                                         | 1.3 | 0.0052  |
| <i>chr14:28218945-28241903 R</i>                  |                                                         | 1.3 | 0.0019  |
| <i>chr17:47006033-47023558 R</i>                  |                                                         | 1.3 | 0.0020  |
| <i>Ensmust00000073543</i>                         |                                                         | 1.3 | 0.0066  |
| <i>Fam171b</i>                                    |                                                         | 1.3 | 0.0076  |
| <i>Gm10447</i>                                    |                                                         | 1.3 | 0.0021  |
| <i>Gm16516</i>                                    |                                                         | 1.3 | 0.0005  |
| <i>Gm9992</i>                                     |                                                         | 1.7 | 0.0001  |

Processes are shown in the order as presented in Figure 3. Categorized transcripts per process were subsequently sorted based on alphabetical order.
