# Supplementary material for: White Adipose Tissue Response of Obese Mice to Ambient Oxygen Restriction at Thermoneutrality: Response Markers Identified, but no WAT Inflammation
Source: MDPI journal article supplement (doi:10.3390/genes10050359), 2019-05-10
Supplement: s1 [file s1]

**Supplementary Table S4.** Genes down regulated by OxR with a fold change <-1.25 and p< 0.01

| Gene symbol                                              | Gene name                                                                 | FC   | P-value |
|----------------------------------------------------------|---------------------------------------------------------------------------|------|---------|
| <b><i>Adipocyte cytoskeleton and matrix proteins</i></b> |                                                                           |      |         |
| <i>1100001G20Rik</i>                                     | RIKEN cDNA 1100001G20 gene                                                | -2.1 | 0.0073  |
| <i>A2ld1</i>                                             | Gamma-glutamylamine cyclotransferase                                      | -1.3 | 0.0033  |
| <i>Acta1</i>                                             | Actin, alpha 1, skeletal muscle                                           | -1.7 | 0.0022  |
| <i>Col4a5</i>                                            | Collagen, type IV, alpha 5                                                | -1.3 | 0.0070  |
| <i>Gkn3</i>                                              | Gastrokine 3                                                              | -1.5 | 0.0003  |
| <i>Hapln3</i>                                            | Hyaluronan and proteoglycan link protein 3                                | -1.3 | 0.0058  |
| <i>Itgbl1</i>                                            | Integrin, beta-like 1                                                     | -1.4 | 0.0030  |
| <i>Krtap11-1</i>                                         | Keratin associated protein 1-1                                            | -1.4 | 0.0013  |
| <i>Lctf</i>                                              | Lactase-like                                                              | -1.6 | 0.0019  |
| <i>Lrtm1</i>                                             | Leucine richrepeats and transmembrane domains 1                           | -1.6 | 0.0004  |
| <i>Maoa</i>                                              | Monoamine oxidase A                                                       | -1.3 | 0.0008  |
| <i>Mme</i>                                               | Membrane metallo endopeptidase                                            | -1.5 | 0.0009  |
| <i>Myom1</i>                                             | Myomesin 1                                                                | -1.3 | 0.0057  |
| <i>Serpina3b</i>                                         | Serine (or cysteine) peptidase inhibitor, clade A, member 3B              | -1.4 | 0.0071  |
| <i>Serpina3m</i>                                         | Serine (or cysteine) peptidase inhibitor, clade A, member 3M              | -1.7 | 0.0004  |
| <i>Tinag</i>                                             | Tubulointerstitial nephritis antigen                                      | -1.8 | 0.0013  |
| <i>Tpm1</i>                                              | Tropomyosin 1, alpha                                                      | -1.4 | 0.0026  |
| <i>Trdn</i>                                              | Triadin                                                                   | -1.9 | 0.0082  |
| <b><i>Metabolism</i></b>                                 |                                                                           |      |         |
| <i>Acox1</i>                                             | Acyl-Coenzyme A oxidase-like                                              | -1.4 | 0.0061  |
| <i>Aldh1a7</i>                                           | Aldehyde dehydrogenase family1, subfamily A7                              | -1.7 | 0.0095  |
| <i>Apoc4</i>                                             | Apolipoprotein C-IV                                                       | -1.4 | 0.0005  |
| <i>Atp1a4</i>                                            | ATPase, Na <sup>+</sup> /K <sup>+</sup> transporting, alpha 4 polypeptide | -1.7 | 0.0087  |
| <i>Bcat1</i>                                             | Branched chain aminotransferase 1, cytosolic                              | -1.3 | 0.0066  |
| <i>Cox8b</i>                                             | Cytochrome c oxidase subunit VIIIb                                        | -1.9 | 0.0055  |
| <i>Fabp12</i>                                            | Fatty acid binding protein 12                                             | -1.4 | 0.0042  |
| <i>Glul</i>                                              | Glutamate-ammonia ligase (glutamine synthetase)                           | -1.3 | 0.0026  |
| <i>Grb14</i>                                             | Growth factor receptor bound protein 14                                   | -1.6 | 0.0003  |
| <i>Gys2</i>                                              | Glycogen synthase 2                                                       | -1.8 | 0.0029  |
| <i>Lrpap1</i>                                            | Low density lipoprotein receptor –related protein associated protein 1    | -1.3 | 0.0031  |
| <i>Mpst</i>                                              | Mercaptopyruvate sulfurtransferase                                        | -1.5 | 0.0020  |
| <i>Nudt14</i>                                            | Nudix (nucleoside diphosphate linked moiety X)-type motif 14              | -1.3 | 0.0001  |
| <i>Ppic</i>                                              | Peptidylprolyl isomerase C                                                | -1.3 | 0.0028  |
| <i>Rwdd3</i>                                             | RWD-domain containing 3                                                   | -1.4 | 0.0009  |
| <i>Sfxn5</i>                                             | Sideroflexin 5                                                            | -1.3 | 0.0011  |
| <i>Tph2</i>                                              | Tryptophan hydroxylase 2                                                  | -2.7 | 0.0033  |
| <i>Tst</i>                                               | Thiosulfate sulfurtransferase, mitochondrial                              | -1.4 | 0.0065  |
| <b><i>Lipid mediators</i></b>                            |                                                                           |      |         |
| <i>Cyp2c44</i>                                           | Cytochrome P450, family 2, subfamily c polypeptide 44                     | -1.8 | 0.0003  |
| <i>D3Bwg0562e</i>                                        | DNA segment, Chr3, Brigham & Women's Genetics 0562 expressed              | -1.9 | 0.0096  |
| <i>Enpp5</i>                                             | Ectonucleotide pyrophosphatase/phosphodiesterase 5                        | -1.4 | 0.0099  |
| <i>Hpgd</i>                                              | Hydroxyprostaglandin dehydrogenase 15 (NAD)                               | -1.3 | 0.0004  |
| <i>Mgst2</i>                                             | microsomal glutathione S-transferase 2                                    | -1.5 | 0.0033  |

| Gene symbol                            | Gene name                                                 | FC   | P-value |
|----------------------------------------|-----------------------------------------------------------|------|---------|
| <i>Pemt</i>                            | Phosphatidylethanolamine N-methyltransferase              | -1.3 | 0.0075  |
| <i>Pla2g2e</i>                         | Phospholipase A2, group IIE                               | -2.5 | 0.0001  |
| <i>Pla2g5</i>                          | Phospholipase A2, group V                                 | -1.9 | 0.0056  |
| <i>Slco3a1</i>                         | Solute carrier organic anion transport family, member 3a1 | -1.5 | 0.0003  |
| <b>Inflammation</b>                    |                                                           |      |         |
| <i>Ccl8</i>                            | Chemokine (C-C motif) ligand 8                            | -1.8 | 0.0002  |
| <i>Clec9a</i>                          | C-type lectin domain family 9, member a                   | -1.4 | 0.0014  |
| <i>S100a8</i>                          | S100 calcium binding protein A8 (calgranulin A)           | -2.8 | 0.0001  |
| <i>Saa1</i>                            | Serum amyloid A 1                                         | -1.8 | 0.0077  |
| <i>Saa3</i>                            | Serum amyloid A 3                                         | -2   | 0.0025  |
| <b>Cholesterol</b>                     |                                                           |      |         |
| <i>Dhcr24</i>                          | 24-dehydrocholesterol reductase                           | -1.6 | 0.0006  |
| <i>Nsdhl</i>                           | NAD(P) dependent steroid dehydrogenase-like               | -1.3 | 0.0078  |
| <i>Tm7sf2</i>                          | Transmembrane 7 superfamily member 2                      | -1.3 | 0.0001  |
| <b>Histone regulation/modification</b> |                                                           |      |         |
| <i>H2-K1</i>                           | Histocompatibility 2, K1, K region                        | -1.3 | 0.0037  |
| <i>H2-Q10</i>                          | Histocompatibility 2, Q region locus 10                   | -1.3 | 0.0060  |
| <i>Zmynd15</i>                         | Zinc finger, MYND-type containing 15                      | -1.4 | 0.0002  |
| <b>Miscellaneous</b>                   |                                                           |      |         |
| <i>Ccdc3</i>                           | Coiled coil domain containing 3                           | -1.4 | 0.0094  |
| <i>Cck</i>                             | Cholecystokinin                                           | -4.4 | 0.0041  |
| <i>Hfe</i>                             | Hemochromatosis                                           | -1.4 | 0.0034  |
| <b>Unknown</b>                         |                                                           |      |         |
| <i>6030419C18Rik</i>                   |                                                           |      |         |
| <i>9130204L05Rik</i>                   |                                                           | -1.8 | 0.0047  |
| <i>A_55_P1981992</i>                   |                                                           | -1.3 | 0.0018  |
| <i>B230311B06Rik</i>                   |                                                           | -1.3 | 0.0032  |
| <i>BC054084</i>                        |                                                           | -1.4 | 0.0023  |
| <i>Chr1:138579972-138587381_F</i>      |                                                           | -1.5 | 0.0026  |
| <i>Chr10:93819821-93976621_F</i>       |                                                           | -1.3 | 0.0008  |
| <i>chr8:89996710-90049453_F</i>        |                                                           | -1.3 | 0.0050  |
| <i>ENSMUST00000090166</i>              |                                                           | -1.4 | 0.0007  |
| <i>NAP060515-1</i>                     |                                                           | -1.3 | 0.0019  |

Processes are shown in the order as presented in Figure 3. Categorized transcripts per process were subsequently sorted based on alphabetical order.
